# Supplementary material for: Usability and acceptance of crowd-based early warning of harmful algal blooms
Source: PeerJ. 2023 Mar 1;11:e14923. doi: 10.7717/peerj.14923 (PMC9985416; doi:10.7717/peerj.14923)
Supplement: Supplemental Information 2 [file peerj-11-14923-s002.xlsx]

## Sheet: Sheet1
id	age	gender	education	profession	upload count	sus1	sus2	sus3	sus4	sus5	sus6	sus7	sus8	sus9	sus10	SUS score	awa1	awa2	awa3	awa4	peu1	peu2	peu3	peu4	puf1	puf2	puf3	att1	att2	att3	att4	rew1	rew2	rew3	soc1	soc2	soc3	int1	int2	int3
9	37	Male	Master degree	Researcher	0	3	2	4	2	4	3	4	2	4	4	65	4	4	4	4	4	4	4	4	4	4	4	4	4	4	4	2	2	3	4	4	4	4	4	4
14	43	Male	Master degree	University lecturer	17	4	2	4	2	4	2	4	2	4	2	75	4	4	3	4	4	4	4	4	3	3	3	3	4	4	4	3	3	3	3	3	4	3	4	3
16	49	Male	Doctoral degree	University lecturer	0	4	2	4	2	4	3	4	2	4	4	67.5	5	4	4	4	4	4	4	4	4	4	4	3	4	4	4	4	3	3	4	4	4	4	4	4
21	34	Male	Master degree	Researcher	0	5	2	4	1	4	3	4	2	4	4	72.5	5	5	5	5	5	5	4	5	4	4	5	3	5	5	5	3	3	3	5	5	5	5	5	5
26	33	Male	Master degree	University lecturer	0	4	4	4	3	3	4	2	3	2	4	42.5	4	4	4	4	4	3	4	3	4	4	4	3	4	4	4	3	3	3	4	4	4	3	4	3
28	53	Male	Doctoral degree	Researcher	10	4	2	5	1	5	2	4	2	4	4	77.5	4	4	4	4	4	4	5	5	4	5	4	4	4	4	4	4	3	3	4	4	4	4	4	4
29	45	Female	Doctoral degree	University lecturer	0	4	3	3	3	4	3	3	3	3	4	52.5	4	4	3	4	4	3	4	4	4	4	3	3	4	4	4	3	3	3	3	3	4	3	4	3
38	47	Female	Doctoral degree	Researcher	0	4	2	4	2	4	3	4	2	4	4	67.5	5	5	5	5	4	4	3	4	4	4	4	3	4	4	4	2	2	2	2	2	4	4	4	4
40	59	Male	Doctoral degree	Researcher	0	5	2	5	2	4	2	4	2	4	4	75	4	4	4	4	4	4	4	4	4	4	4	4	4	4	4	4	4	4	4	4	4	4	4	4
58	32	Male	Bachelor degree	Fishery instructor	1	5	2	5	2	4	2	4	1	4	5	75	4	4	4	4	4	4	4	4	5	5	5	4	4	4	4	4	4	4	3	2	4	4	4	4
62	54	Male	Bachelor degree	Fishery instructor	6	4	2	4	3	4	2	4	2	4	4	67.5	4	3	4	4	4	4	4	4	5	5	5	4	4	4	4	5	3	3	3	4	4	5	5	5
88	29	Male	Bachelor degree	Fishery instructor	0	4	2	4	2	4	3	4	2	4	4	67.5	4	4	4	4	4	4	4	4	4	4	4	4	4	4	4	4	4	4	4	4	4	4	4	4
100	56	Female	Master degree	Government employee	12	4	2	4	2	3	3	3	2	2	4	57.5	5	4	5	4	4	4	4	4	5	4	5	3	4	4	3	2	2	2	4	4	4	4	4	4
105	32	Female	Bachelor degree	Fishery instructor	8	4	2	4	2	4	2	4	2	4	2	75	4	3	4	4	4	4	4	4	4	4	4	4	4	4	4	4	4	4	4	4	4	4	4	4
110	29	Female	Master degree	University lecturer	10	4	2	4	2	4	3	3	2	4	4	65	4	4	4	4	4	4	4	4	4	4	4	4	4	4	4	4	4	4	4	4	4	4	4	4
120	28	Male	Bachelor degree	Fishery instructor	3	3	2	5	2	4	2	4	2	4	5	67.5	4	4	4	3	3	3	3	3	4	4	4	4	5	3	3	4	5	4	3	3	4	3	3	3
121	49	Female	Doctoral degree	Researcher	0	4	3	4	2	3	2	4	2	4	4	65	5	5	5	4	3	3	4	4	4	4	5	3	4	4	4	3	3	3	3	3	5	3	4	3
127	28	Male	Master degree	College student	6	5	2	4	2	3	3	4	2	4	3	70	5	4	4	4	5	5	5	4	3	4	3	4	5	5	5	5	5	5	3	3	3	5	5	5
212	41	Male	Bachelor degree	College student	2	5	2	4	2	4	3	4	2	4	4	70	5	4	4	4	4	4	4	4	4	4	4	4	4	4	4	4	3	3	4	3	5	4	4	4
220	40	Male	Bachelor degree	Researcher	3	4	3	3	4	2	4	3	4	2	5	35	5	3	5	5	4	4	3	4	5	5	4	3	5	5	5	3	2	2	3	3	5	4	4	4
226	51	Male	Master degree	University lecturer	0	5	3	3	3	3	1	5	1	5	5	70	5	3	4	4	4	3	4	4	5	5	5	5	5	5	5	3	3	5	5	5	5	5	5	5
229	47	Female	Master degree	Researcher	0	3	3	3	4	3	3	3	3	3	4	45	4	3	4	4	3	3	3	3	4	4	4	4	4	4	4	4	3	3	4	4	4	3	4	4
235	19	Female	High school	College student	7	4	2	5	2	4	3	5	2	4	2	77.5	4	3	4	4	5	4	5	4	5	5	5	5	5	5	5	4	5	5	4	4	5	4	4	4
238	19	Male	High school	College student	8	5	1	5	4	4	1	5	1	5	2	87.5	5	5	5	5	5	5	5	5	5	5	5	5	5	5	5	2	2	2	5	5	5	5	5	5
239	20	Male	High school	College student	0	5	1	4	2	4	3	3	2	4	4	70	4	5	5	5	4	5	5	5	4	4	4	5	5	5	5	5	4	4	4	4	4	4	4	4
240	20	Male	High school	College student	6	4	2	4	2	4	3	4	2	4	4	67.5	5	4	5	4	5	4	4	4	5	5	4	4	5	5	4	3	3	3	3	3	4	4	4	4
241	19	Female	High school	College student	0	4	2	4	2	4	3	3	2	4	4	65	4	4	4	4	4	4	4	4	4	4	3	4	4	4	4	4	4	4	3	3	4	3	4	4
244	20	Male	High school	College student	6	5	2	5	2	4	2	5	1	5	4	82.5	4	4	5	5	5	5	5	5	5	5	5	4	5	5	5	4	3	3	4	4	4	5	5	5
248	20	Female	High school	College student	5	5	5	4	2	4	2	5	1	4	3	72.5	4	3	5	4	4	3	5	3	5	5	4	3	5	4	5	2	2	2	3	3	4	3	5	3
249	19	Female	High school	College student	6	5	1	4	2	2	4	2	2	2	4	55	2	4	4	4	4	4	4	4	4	4	3	5	5	4	4	5	5	5	4	4	4	4	4	4
252	21	Male	High school	College student	6	4	2	4	3	4	3	5	2	5	5	67.5	4	4	4	4	5	4	5	5	5	5	5	4	5	5	5	4	4	4	4	5	4	4	2	4
253	19	Female	High school	College student	7	4	2	4	2	4	2	4	2	5	3	75	4	4	4	4	4	4	5	4	5	5	4	4	5	4	4	4	5	5	4	3	4	4	4	4
261	19	Female	High school	College student	2	4	2	5	2	3	2	4	2	4	4	70	5	5	5	4	5	5	5	5	5	5	5	5	5	5	5	5	5	4	5	5	5	4	4	5
273	19	Female	High school	College student	5	3	3	3	3	3	3	3	3	3	3	50	3	3	3	3	3	3	3	3	3	3	3	3	4	3	3	3	3	3	3	3	3	3	3	3
276	19	Female	High school	College student	6	4	1	5	5	5	2	5	1	5	1	85	4	4	4	5	5	5	5	5	5	5	5	2	5	5	5	5	5	5	4	4	5	3	5	3
279	17	Male	High school	College student	6	5	2	4	2	5	2	4	2	4	2	80	4	3	5	4	4	5	4	4	5	5	5	4	4	4	5	3	3	3	4	4	5	4	4	4
281	18	Female	High school	College student	1	3	5	3	5	3	3	4	4	2	4	35	3	3	3	3	3	3	3	3	4	4	3	3	3	3	3	3	3	3	3	3	3	3	3	3
284	19	Male	High school	College student	1	1	2	5	2	4	2	5	2	4	5	65	4	3	4	4	5	5	5	5	5	5	5	4	4	5	5	5	5	5	5	5	5	4	5	4
285	20	Female	High school	College student	0	5	2	4	3	4	3	2	2	4	3	65	4	4	4	4	4	4	3	4	4	4	3	4	5	4	4	2	2	2	3	4	5	4	4	5
287	20	Female	High school	College student	6	5	1	5	5	5	3	5	1	3	3	75	5	5	5	5	5	4	5	5	5	5	5	5	5	5	5	5	3	3	5	5	5	5	5	5
289	18	Male	High school	College student	5	4	1	5	2	2	2	5	2	5	3	77.5	5	4	4	4	5	4	4	4	5	5	4	4	4	4	4	4	4	4	4	3	5	4	4	4
290	18	Male	High school	College student	6	5	2	5	2	4	2	5	2	5	3	82.5	5	4	3	3	4	4	4	4	5	5	4	5	5	5	4	5	5	5	3	3	2	4	5	5
297	47	Male	Bachelor degree	Fishery instructor	6	3	2	4	1	4	2	3	2	5	4	70	5	4	3	4	4	4	4	5	4	4	4	4	5	4	4	5	5	5	3	3	4	4	3	4
300	19	Female	High school	College student	5	3	2	4	3	4	3	4	2	4	4	62.5	4	3	4	4	4	4	4	4	4	4	3	4	4	4	4	4	4	4	3	3	4	3	3	3
302	18	Female	High school	College student	1	4	3	4	4	2	4	4	3	2	5	42.5	4	4	4	4	3	3	2	3	4	4	4	4	5	5	5	3	3	3	4	4	4	5	5	5
303	19	Male	High school	College student	3	5	2	5	2	5	2	5	2	4	4	80	3	4	4	4	5	4	4	4	5	5	4	5	5	4	4	3	3	3	3	1	4	4	4	4
311	18	Female	High school	College student	6	3	3	3	4	3	3	3	3	3	3	47.5	3	3	3	3	3	3	3	3	4	4	4	4	4	4	3	5	3	3	3	3	3	3	4	3
312	18	Female	High school	College student	0	4	2	4	2	4	2	2	4	2	4	55	4	4	4	4	2	2	3	2	4	4	4	4	4	5	4	3	2	2	3	3	4	4	4	4
313	18	Male	High school	College student	22	5	2	5	2	5	2	5	2	5	4	82.5	4	4	4	4	4	4	4	4	4	4	3	5	5	5	5	5	5	5	2	2	4	5	4	4
314	18	Female	High school	College student	0	4	2	4	4	4	2	4	2	4	4	65	2	4	4	4	4	4	4	4	3	4	4	4	4	4	3	4	4	4	4	4	4	4	4	4
316	18	Male	High school	College student	0	3	2	5	2	3	3	4	2	2	4	60	4	3	3	3	4	3	4	4	4	4	3	4	4	4	4	4	4	4	3	3	4	3	4	3
317	17	Female	High school	College student	1	4	2	4	3	3	2	5	2	4	5	65	4	4	5	3	5	4	4	4	5	5	3	5	5	5	4	4	3	3	3	3	5	4	4	4
319	19	Male	High school	College student	2	4	2	4	2	4	2	5	3	4	4	70	4	4	4	4	4	4	4	4	5	4	3	3	4	5	3	5	5	5	4	4	5	4	4	4
322	45	Male	Master degree	Researcher	7	4	1	5	1	4	2	4	2	4	4	77.5	4	4	4	4	4	3	4	4	4	4	3	4	4	4	4	4	3	3	3	4	4	4	4	4
323	18	Male	High school	College student	0	4	2	5	2	5	2	5	2	5	2	85	5	4	5	5	5	5	5	5	5	5	5	5	5	5	5	5	5	5	5	5	5	5	5	5
331	20	Female	High school	College student	3	4	2	4	3	4	2	4	2	4	3	70	4	4	3	3	4	4	4	4	4	4	4	5	4	4	4	5	4	4	4	4	4	4	4	4
332	46	Female	Doctoral degree	Researcher	3	5	2	4	2	4	2	4	2	4	5	70	4	4	4	4	4	4	4	4	5	5	5	5	5	5	5	5	4	4	5	4	5	4	4	4
334	17	Female	High school	College student	6	5	2	5	2	5	2	5	2	5	2	87.5	5	4	5	5	5	5	5	5	5	5	5	2	5	5	5	3	2	2	2	4	5	5	5	5
337	18	Male	High school	College student	6	4	2	4	2	4	2	4	2	4	2	75	3	4	4	4	4	4	4	4	4	5	4	5	4	4	4	5	4	4	4	4	4	4	4	4
339	19	Female	High school	College student	6	3	3	4	3	4	3	4	2	4	4	60	3	3	3	3	3	3	3	3	3	3	3	3	3	3	3	2	2	2	3	3	4	3	3	3
341	19	Female	High school	College student	2	4	2	5	3	3	3	4	2	4	3	67.5	4	3	4	4	4	4	5	4	4	4	4	5	4	4	4	5	5	5	3	3	4	3	4	3
343	33	Male	Bachelor degree	Researcher	55	4	2	4	2	4	2	4	2	4	2	75	4	4	4	4	4	4	4	4	3	3	4	3	4	4	3	4	3	3	3	3	4	4	3	4
344	19	Female	High school	College student	6	3	1	1	2	4	3	5	1	4	2	70	4	4	4	4	4	3	4	5	4	5	3	2	4	4	5	1	1	1	4	4	4	4	3	3
347	19	Female	High school	College student	6	4	3	3	4	4	3	3	3	3	4	50	4	4	4	3	3	3	3	3	4	4	4	4	4	4	4	3	3	3	3	3	4	4	4	3
348	18	Female	High school	College student	0	3	3	4	4	3	4	3	4	3	5	40	5	3	3	4	3	3	3	3	4	4	3	4	4	4	4	3	2	2	3	3	5	3	3	4
357	19	Female	High school	College student	0	4	2	5	1	3	2	3	2	4	4	70	4	3	3	3	4	4	4	3	4	4	4	3	4	4	3	3	3	3	4	4	4	4	3	4
361	36	Female	Master degree	Researcher	7	4	2	4	2	4	2	4	2	4	2	75	4	4	4	4	4	4	4	4	4	4	4	4	4	4	4	4	4	4	4	3	4	4	4	4
374	38	Male	Bachelor degree	Fishery instructor	6	4	2	4	2	4	2	4	2	4	4	70	4	4	4	4	4	4	4	4	4	4	4	4	4	4	4	4	4	4	4	3	4	3	3	3
387	34	Female	Bachelor degree	Researcher	7	5	1	5	1	4	4	4	2	2	4	70	5	4	5	5	4	4	4	4	4	5	5	4	4	4	4	4	4	4	4	4	4	4	4	4
391	40	Male	Master degree	Researcher	6	4	2	4	2	5	2	4	2	5	2	80	5	4	4	4	5	4	4	4	5	5	4	3	4	4	4	3	3	3	4	4	5	4	4	4
404	19	Male	High school	College student	3	4	2	4	2	4	2	4	2	2	2	70	4	4	4	3	5	5	5	4	4	4	4	4	4	4	4	3	2	2	2	3	4	3	3	3
405	19	Female	High school	College student	6	4	2	5	2	5	2	5	2	5	2	85	4	4	4	4	5	5	5	5	5	4	4	5	5	5	5	5	5	5	4	4	5	4	4	4
416	29	Female	Master degree	Researcher	6	4	2	4	2	4	2	4	2	4	4	70	4	4	4	4	4	4	5	4	4	4	4	4	4	4	4	4	4	4	3	3	4	4	4	4
420	19	Female	High school	College student	0	5	1	5	1	5	1	5	1	5	5	90	5	5	5	5	5	5	5	5	5	5	5	5	5	5	5	5	5	5	5	5	5	5	5	5
424	45	Female	Master degree	Researcher	6	4	3	3	2	3	3	2	3	3	4	50	4	3	4	3	3	3	3	4	3	3	3	3	3	3	3	3	2	2	3	2	3	4	3	3
425	25	Male	Master degree	Researcher	6	4	2	4	1	3	3	4	2	4	2	72.5	5	4	4	3	5	5	4	5	4	4	4	5	4	4	4	5	5	5	3	3	4	4	4	4
434	20	Male	High school	College student	0	4	3	4	3	2	3	4	2	3	4	55	4	4	3	3	4	4	4	4	4	4	3	4	4	3	3	4	5	5	2	2	4	4	3	3
445	19	Female	High school	College student	1	4	3	4	3	4	3	4	2	3	4	60	4	4	4	4	4	4	3	4	4	4	4	4	5	5	5	4	4	4	4	3	4	4	4	5
452	48	Female	Master degree	Researcher	6	4	2	4	4	4	3	4	2	4	2	67.5	4	4	4	4	4	4	4	4	4	3	4	3	4	4	4	4	3	3	3	3	4	4	4	4
453	21	Male	High school	College student	0	3	3	3	4	3	3	3	4	3	4	42.5	3	3	3	3	3	3	3	3	4	4	3	3	3	3	3	3	3	3	3	3	3	3	3	3
467	30	Female	Master degree	Teacher	6	4	2	4	2	5	2	5	2	4	2	80	4	4	4	4	4	4	5	4	5	5	5	4	5	5	5	4	4	4	4	4	4	4	5	4
487	45	Male	Master degree	University lecturer	0	5	3	5	1	5	3	5	3	5	3	80	5	5	5	5	5	5	5	5	5	5	3	5	5	5	5	5	5	5	3	3	5	3	3	5
488	38	Male	Bachelor degree	Fishery instructor	6	4	2	4	2	4	2	4	2	2	4	65	4	3	4	4	4	4	4	4	5	4	4	3	3	4	3	4	4	4	3	3	5	4	4	3
491	45	Female	Master degree	Government employee	5	3	2	5	2	2	3	5	2	4	4	65	5	4	4	3	4	4	5	4	5	4	3	4	5	5	4	5	5	5	3	2	4	3	4	3
504	18	Female	High school	College student	0	4	3	4	4	4	2	4	2	4	4	62.5	4	4	4	4	4	4	4	4	4	4	4	4	4	4	4	4	4	4	4	4	4	4	4	4
511	33	Male	Bachelor degree	College student	6	4	2	4	2	4	2	4	2	4	2	75	4	4	4	3	4	4	4	4	4	4	3	4	4	4	4	5	4	4	3	3	4	3	3	3
513	19	Female	High school	College student	5	3	2	4	3	4	3	4	2	4	4	62.5	3	3	4	4	4	3	4	4	4	4	3	4	4	4	4	4	3	3	3	3	4	3	3	4
520	17	Female	High school	College student	1	5	3	3	4	3	2	4	3	2	4	52.5	4	4	4	4	4	4	4	4	4	4	4	4	4	4	4	4	4	4	4	3	4	4	4	4
523	19	Female	High school	College student	0	4	3	4	3	4	3	4	3	4	4	60	4	4	4	4	4	3	4	4	4	4	4	3	4	4	4	3	3	3	3	3	3	3	4	4
528	30	Male	High school	Fisher	3	5	2	3	5	5	1	5	2	5	2	77.5	5	4	4	4	4	4	4	4	4	4	4	5	5	5	5	5	5	5	4	4	4	4	5	5
529	58	Male	High school	Fisher	5	4	2	4	4	2	4	3	2	2	4	47.5	4	2	4	4	2	3	4	4	4	4	4	4	5	5	4	5	5	5	4	4	4	4	4	4
530	40	Male	High school	Fisher	8	4	2	4	4	4	2	4	2	4	5	62.5	4	2	4	4	4	2	4	4	5	5	4	2	4	4	4	2	2	2	3	3	4	4	4	4
535	51	Male	High school	Fisher	7	4	2	4	4	4	2	4	2	4	4	65	4	3	4	4	4	4	4	4	4	4	4	4	4	4	4	4	4	4	3	3	4	3	3	3
536	46	Male	High school	Fisher	8	4	2	4	4	4	2	4	2	4	4	65	4	4	4	4	4	2	4	4	4	4	4	4	4	4	4	2	2	2	2	2	4	4	3	4
545	44	Male	Master degree	Researcher	6	4	2	4	2	4	2	4	2	4	2	75	4	4	4	4	4	4	4	4	4	4	4	3	4	4	4	3	3	3	3	3	4	4	4	4
547	40	Male	Master degree	Researcher	0	3	3	3	3	3	3	3	3	3	3	50	4	4	3	3	3	3	3	3	3	3	3	3	3	3	3	3	3	3	3	3	3	3	3	3
550	33	Male	Master degree	University lecturer	1	5	3	3	1	3	3	4	2	4	2	70	4	4	4	4	4	4	3	4	4	4	4	4	4	4	4	3	2	2	4	4	4	3	4	3
551	19	Female	High school	College student	0	3	2	4	3	4	3	4	2	3	3	62.5	5	4	4	4	4	4	4	4	5	4	3	3	4	4	3	3	3	3	3	3	4	3	3	3
553	45	Female	Doctoral degree	Researcher	0	5	2	5	2	4	3	4	2	2	4	67.5	5	5	5	4	4	4	4	4	5	5	4	4	5	5	5	5	4	4	3	4	5	5	5	5
555	54	Female	Doctoral degree	University lecturer	0	4	3	3	5	4	3	2	3	2	5	40	4	4	4	4	4	3	4	4	5	5	5	4	5	5	5	4	3	3	4	3	5	5	5	4
559	24	Male	Bachelor degree	Teacher	0	3	3	3	3	3	3	3	3	3	3	50	3	3	3	3	3	3	3	3	3	3	3	3	3	3	3	3	3	3	3	3	3	3	3	3
568	24	Female	Bachelor degree	College student	1	3	1	4	3	4	3	4	3	4	4	62.5	4	4	4	4	4	4	4	4	4	4	4	4	4	4	4	4	4	4	4	4	4	4	4	4
579	24	Female	Bachelor degree	College student	0	5	2	5	5	4	3	5	1	3	4	67.5	4	5	5	5	5	5	5	4	5	5	5	5	5	5	5	4	4	4	5	5	5	5	5	5
596	19	Female	High school	College student	0	4	2	4	2	4	2	4	2	4	2	75	4	3	4	4	4	4	4	4	4	4	4	4	4	4	4	4	4	4	4	2	4	4	4	4
